# Supplementary material for: Synthesis of Nd3+/Yb3+ sensitized upconversion core–shell nanocrystals with optimized hosts and doping concentrations
Source: Royal Society of Chemistry journal article supplement (doi:10.1039/c5ra09873d), 2015-01-01
Supplement: c5ra09873d1.pdf [file c5ra09873d1.pdf]

## Supporting Information

### Synthesis of Nd<sup>3+</sup>/Yb<sup>3+</sup> Sensitized Upconversion Core-shell Nanocrystals with Optimized Hosts and Doping Concentrations

*Kun Wang,<sup>1</sup> Wanli Qincheng,<sup>1</sup> Yong Zhang,<sup>2\*</sup> Ru Qiao,<sup>2</sup> Sheng Li<sup>1</sup> and Zhengquan Li<sup>1,2\*</sup>*

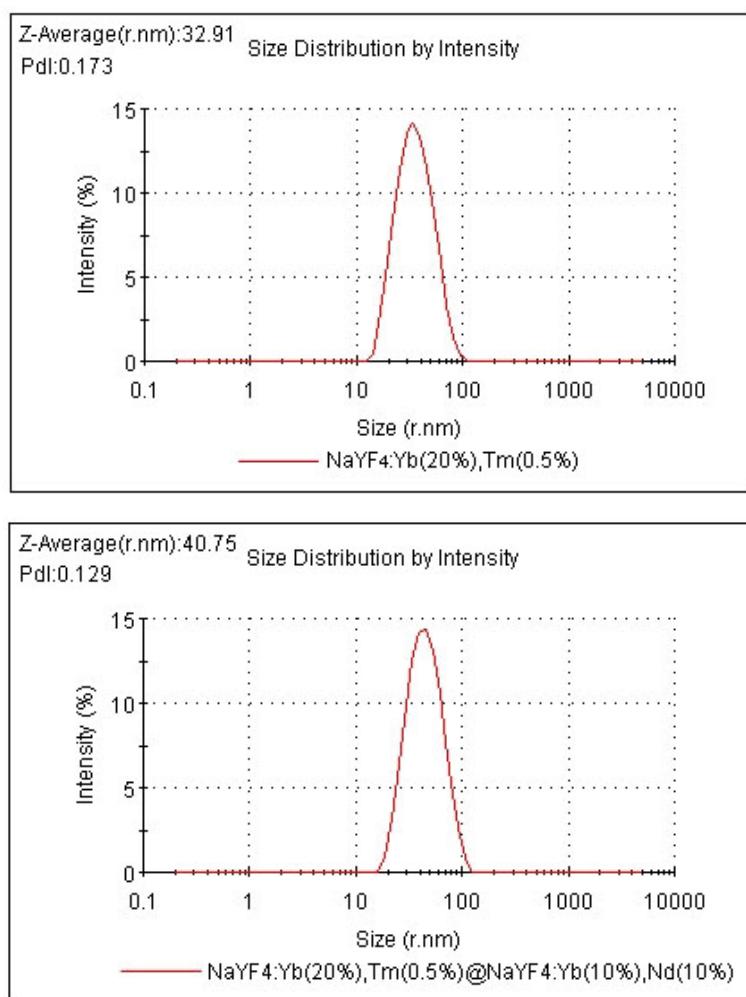

**Figure S1.** Size distributions of the NaYF<sub>4</sub> NCs (seeds) and the core-shell NaYF<sub>4</sub>@NaGdF<sub>4</sub> NCs. Average diameters of the NaYF<sub>4</sub> NCs and NaYF<sub>4</sub>@NaGdF<sub>4</sub> NCs are about 32.9nm and 42.7nm, respectively. This data confirms the uniformity of these core-shell NCs and the increase in diameter after the shell growth.

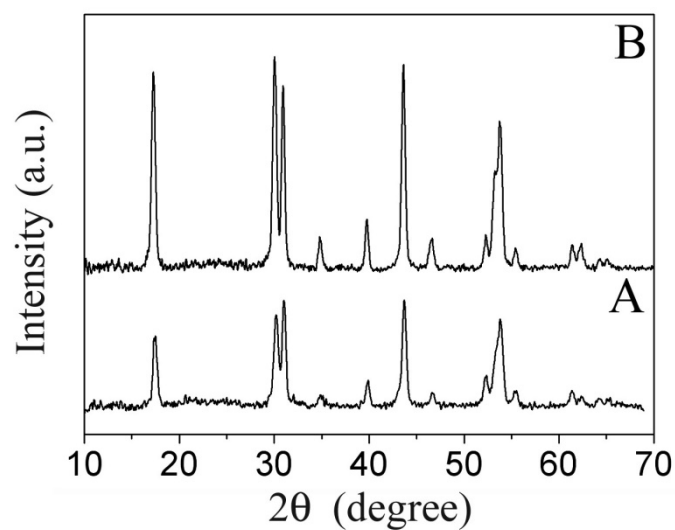

**Figure S2.** XRD patterns of (A) the NaYF<sub>4</sub>:Yb,Tm seeds and (B) the prepared NaYF<sub>4</sub>:Yb,Tm@NaGdF<sub>4</sub>:Yb,Nd NCs. All diffraction peaks of the NaYF<sub>4</sub>:Yb,Tm NCs can be clearly indexed to the pure hexagonal NaYF<sub>4</sub> crystal (JCPDS No. 28-1192). XRD patterns of the NaYF<sub>4</sub>:Yb,Tm@NaGdF<sub>4</sub>:Yb,Nd NCs were much similar to those of the core NCs, albeit a little stronger in intensity. The increased intensity could have resulted from the size increase of the NCs and the similar crystal structure between NaYF<sub>4</sub> and NaGdF<sub>4</sub> (JCPDS No. 27-0699).

| <b>Element</b>            | Gd<br>(3d) | Y<br>(4d) | Yb<br>(4d) | Nd<br>(4d) | Tm<br>(4d) | Na<br>(1s) | F (1s) | C (1s) | O<br>(1s) |
|---------------------------|------------|-----------|------------|------------|------------|------------|--------|--------|-----------|
| <b>Content<br/>(at.%)</b> | 18.13      | 8.37      | 3.93       | 2.12       | 0.01       | 13.47      | 37.35  | 12.83  | 3.79      |

**Table S1.** Element contents of the surface of NaYF<sub>4</sub>:Yb(20%),Tm(0.5%)@NaGdF<sub>4</sub>:Yb(10%),Nd(10%) determined by XPS analysis.

The XPS analysis was also employed to investigate the surface information of the core-shell Y@Gd NCs. Though all the lanthanide elements could be detected in the fine-scan mode, it should be noted that the Gd element is predominant on the surface (18.13 at.%) of the core-shell NCs, which is significantly higher than the element Y (8.37 at.%). These XPS results imply that the surface of the core-shell nanocrystals mainly consists of NaGdF<sub>4</sub> shell. The signals from C and O are from the surface-adsorbed oleic acids (OA) on the core-shell NCs during synthesis.

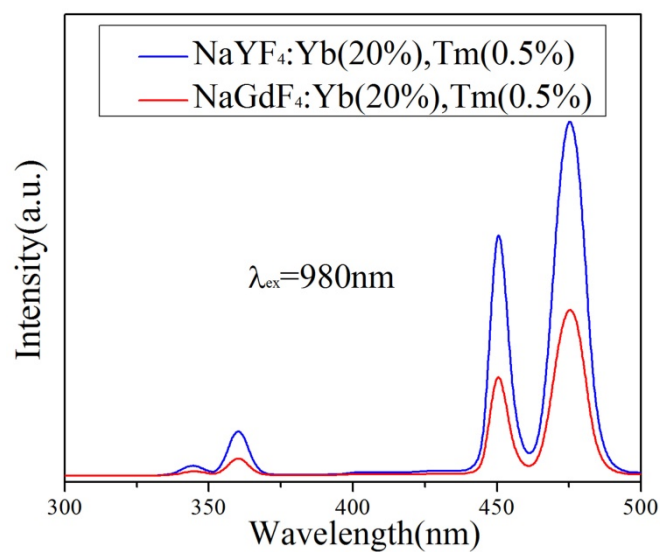

**Figure S3.** UC emission spectra of NaYF<sub>4</sub>:Yb(20%),Tm(0.5%) and NaGdF<sub>4</sub>:Yb(20%),Tm(0.5%) under 980nm excitation. This data shows that NaYF<sub>4</sub> is a better host for UC fluorescence than NaGdF<sub>4</sub> for Yb<sup>3+</sup>/Tm<sup>3+</sup> codoping when they have a similar size, doping level and the same hexagonal phases.

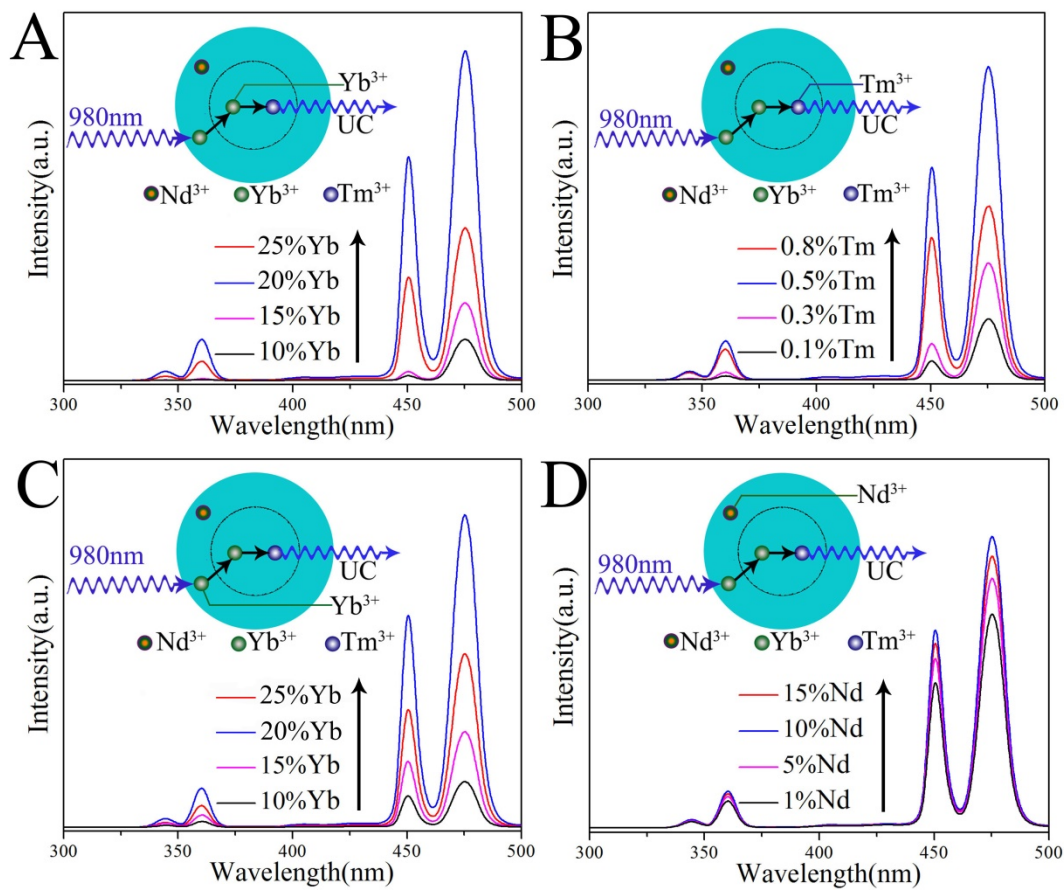

**Figure S4.** Comparison of UC emission intensities of  $\text{NaYF}_4:\text{Yb},\text{Tm}@NaYF_4:\text{Yb},\text{Nd}$  UCNs under 980nm excitation by changing the doping concentration of different ions: (A)  $\text{Yb}^{3+}$  in the core; (B)  $\text{Tm}^{3+}$  in the core; (C)  $\text{Yb}^{3+}$  in the shell; (D)  $\text{Nd}^{3+}$  in the shell.
